# Supplementary material for: Serotype distribution and antibiogram of Streptococcus parauberis isolated from fish in South Korea
Source: PubMed Central journal article supplement (PMC10581249; doi:10.1128/spectrum.04400-22), 2023-08-09
Supplement: spectrum.04400-22-s0001.pdf [file spectrum.04400-22-s0001.pdf]

## Supplementary materials and methods

### Whole genome sequencing

In this study, whole genome of four *S. parauberis* isolates (KSP45, SPOF19J15, SPOF21J2 and SPOF21J26) were sequenced based on Oxford Nanopore sequencing platform as previously described with slight modifications (1). Genomic DNA were extracted using the Wizard genomic DNA purification kit (Promega, USA) and quantified using a Qubit 3.0 fluorometer (Invitrogen, USA) and a Qubit double-stranded DNA (dsDNA) high-sensitivity (HS) kit (Invitrogen) according to the manufacturers' instructions. Sequencing libraries were prepared using the ligation sequencing kit (SQK-LSK109; Oxford Nanopore Technologies [ONT], UK) with the barcoding kit (EXP-NBD104; ONT), following the manufacturers' instructions. Whole genome sequencing was performed on MinION Mk1B system (ONT) using a SpotON R9.4.1 flow cell (ONT). Base-calling was performed using MinKNOW v19.10.1 software (ONT) with a high-accuracy base-calling mode. After assessment of sequencing quality using MinIONQC v1.4.2 (2), *de novo* assembly and polishing were performed using Flye v2.9 (3) and Medaka v1.2.1 (<https://github.com/nanoporetech/medaka>). The quality of assembly was evaluated with QUAST v5.0.2 (4). Genes were predicted and annotated based on the National Center for Biotechnology Information (NCBI) Prokaryotic Genome Annotation Pipeline (PGAP) v6.2 (5).

## Supplementary results

### Whole genome sequencing

In this study, four *S. parauberis* genomes (KSP45 and SPOF19J26, serotype Ia; SPOF19J15, serotype Ib/Ic; SPOF21J2, serotype II) were sequenced based on Oxford Nanopore sequencing platform. Briefly, an average of 27,845 Nanopore long reads (an average N<sub>50</sub>, 18,092 bp) were generated, which were then assembled in complete level (an average sequencing depth, 247x). Briefly, genomes of KSP45, SPOF19J15 and SPOF21J2 were composed of a single circular chromosome with size of 2.15, 1.99 and 2 Mb, respectively. SPOF21J26 harbored an ~12 kb-sized plasmid, in addition to 2.07 Mb-sized chromosome, which could be also found in genome sequences of other serotype Ia genomes as previously demonstrated (6, 7). More detailed information on genome is available in Table S4 and BioProject accession [PRJNA940317](https://www.ncbi.nlm.nih.gov/bioproject/PRJNA940317).

## Supplementary tables

**Table S1. Year of isolation, source, origin, and serotype of *Streptococcus parauberis* strains used in this study**

| No. | Strain code | Year of isolation | Origin          | Source (Province)               | Serotype |
|-----|-------------|-------------------|-----------------|---------------------------------|----------|
| 1   | KSP44       | 1999              | Olive flounder  | Jeju Island                     | 1a       |
| 2   | KSP45       | 1999              | Olive flounder  | Jeju Island                     | 1a       |
| 3   | KSP46       | 1999              | Olive flounder  | Jeju Island                     | 1a       |
| 4   | KSP47       | 1999              | Olive flounder  | Gyeongsangbukdo<br>(Gyeongsang) | 1a       |
| 5   | KSP1        | 2003              | Olive flounder  | Jeju Island                     | II       |
| 6   | KSP2        | 2003              | Olive flounder  | Jeju Island                     | 1a       |
| 7   | KSP3        | 2003              | Olive flounder  | Jeju Island                     | 1a       |
| 8   | KSP4        | 2003              | Olive flounder  | Jeju Island                     | II       |
| 9   | KSP5        | 2004              | Olive flounder  | Jeju Island                     | 1b/1c    |
| 10  | KSP6        | 2004              | Olive flounder  | Jeju Island                     | 1b/1c    |
| 11  | KSP7        | 2004              | Olive flounder  | Jeju Island                     | 1a       |
| 12  | KSP8        | 2004              | Olive flounder  | Jeju Island                     | 1a       |
| 13  | KSP9        | 2004              | Olive flounder  | Jeju Island                     | 1a       |
| 14  | KSP10       | 2004              | Olive flounder  | Jeju Island                     | II       |
| 15  | KSP12       | 2005              | Olive flounder  | Jeju Island                     | 1b/1c    |
| 16  | KSP13       | 2005              | Olive flounder  | Jeju Island                     | 1b/1c    |
| 17  | KSP14       | 2005              | Olive flounder  | Jeju Island                     | II       |
| 18  | KSP15       | 2005              | Olive flounder  | Jeju Island                     | 1b/1c    |
| 19  | KSP16       | 2005              | Olive flounder  | Jeju Island                     | 1b/1c    |
| 20  | KSP17       | 2005              | Olive flounder  | Jeju Island                     | 1b/1c    |
| 21  | KSP20       | 2005              | Olive flounder  | Jeju Island                     | 1b/1c    |
| 22  | KSP22       | 2005              | Olive flounder  | Haenam (Jeolla)                 | 1b/1c    |
| 23  | KSP23       | 2005              | Olive flounder  | Haenam (Jeolla)                 | 1b/1c    |
| 24  | KSP24       | 2005              | Olive flounder  | Wando (Jeolla)                  | 1b/1c    |
| 25  | KSP26       | 2005              | Olive flounder  | Wando (Jeolla)                  | 1b/1c    |
| 26  | KSP27       | 2005              | Olive flounder  | Wando (Jeolla)                  | 1b/1c    |
| 27  | KSP28       | 2005              | Olive flounder  | Wando (Jeolla)                  | 1b/1c    |
| 28  | KSP34       | 2005              | Olive flounder  | Wando (Jeolla)                  | 1b/1c    |
| 29  | KSP38       | 2005              | Olive flounder  | Wando (Jeolla)                  | 1b/1c    |
| 30  | PH0710      | 2007              | Starry flounder | Pohang (Gyeongsang)             | 1a       |
| 31  | PH0711      | 2007              | Starry flounder | Pohang (Gyeongsang)             | 1a       |
| 32  | SPOF3K      | 2013              | Olive flounder  | Geojedo (Gyeongsang)            | 1a       |
| 33  | 04151K      | 2013              | Olive flounder  | Geojedo (Gyeongsang)            | 1a       |
| 34  | 04162K      | 2013              | Olive flounder  | Geojedo (Gyeongsang)            | 1a       |
| 35  | HFTC0023    | 2014              | Olive flounder  | Pohang (Gyeongsang)             | 1a       |
| 36  | HFTC0059    | 2014              | Olive flounder  | Pohang (Gyeongsang)             | 1a       |
| 37  | HFTC0060    | 2014              | Olive flounder  | Pohang (Gyeongsang)             | 1a       |
| 38  | HFTC0063    | 2014              | Olive flounder  | Pohang (Gyeongsang)             | 1a       |
| 39  | HFTC0064    | 2014              | Olive flounder  | Pohang (Gyeongsang)             | 1a       |
| 40  | HFTC0076    | 2014              | Starry flounder | Yeongdeok (Gyeongsang)          | 1b/1c    |
| 41  | HFTC0083    | 2015              | Starry flounder | Yeongdeok (Gyeongsang)          | 1a       |
| 42  | HFTC0086    | 2015              | Starry flounder | Uljin (Gyeongsang)              | 1a       |
| 43  | HFTC0091    | 2015              | Starry flounder | Uljin (Gyeongsang)              | 1a       |
| 44  | HFTC0157    | 2015              | Starry flounder | Pohang (Gyeongsang)             | 1a       |
| 45  | HFTC0237    | 2015              | Starry flounder | Yeongdeok (Gyeongsang)          | 1a       |
| 46  | SPOF18J1    | 2018              | Olive flounder  | Jeju Island                     | 1a       |
| 47  | SPOF18J2    | 2018              | Olive flounder  | Jeju Island                     | 1a       |

|     |           |      |                 |                      |       |
|-----|-----------|------|-----------------|----------------------|-------|
| 48  | SPOF18J3  | 2018 | Olive flounder  | Jeju Island          | la    |
| 49  | SPOF18J4  | 2018 | Olive flounder  | Jeju Island          | la    |
| 50  | SPOF18J5  | 2018 | Olive flounder  | Jeju Island          | la    |
| 51  | SPOF18J6  | 2018 | Olive flounder  | Jeju Island          | lb/lc |
| 52  | SPOF18J7  | 2018 | Olive flounder  | Jeju Island          | lb/lc |
| 53  | SPOF18J8  | 2018 | Olive flounder  | Jeju Island          | la    |
| 54  | SPOF18J9  | 2018 | Olive flounder  | Jeju Island          | la    |
| 55  | SPOF18J10 | 2018 | Olive flounder  | Jeju Island          | la    |
| 56  | SPOF18J11 | 2018 | Olive flounder  | Jeju Island          | lb/lc |
| 57  | SPOF18J12 | 2018 | Olive flounder  | Jeju Island          | la    |
| 58  | SPOF18J13 | 2018 | Olive flounder  | Jeju Island          | lb/lc |
| 59  | SPOF18G1  | 2018 | Starry flounder | Uljin (Gyeongsang)   | la    |
| 60  | SPOF18G2  | 2018 | Starry flounder | Goseong (Gyeongsang) | la    |
| 61  | SPOF19J1  | 2019 | Olive flounder  | Jeju Island          | lb/lc |
| 62  | SPOF19J2  | 2019 | Olive flounder  | Jeju Island          | lb/lc |
| 63  | SPOF19J3  | 2019 | Olive flounder  | Jeju Island          | la    |
| 64  | SPOF19J4  | 2019 | Olive flounder  | Jeju Island          | la    |
| 65  | SPOF19J5  | 2019 | Olive flounder  | Jeju Island          | la    |
| 66  | SPOF19J6  | 2019 | Olive flounder  | Jeju Island          | lb/lc |
| 67  | SPOF19J7  | 2019 | Olive flounder  | Jeju Island          | la    |
| 68  | SPOF19J8  | 2019 | Olive flounder  | Jeju Island          | la    |
| 69  | SPOF19J9  | 2019 | Olive flounder  | Jeju Island          | la    |
| 70  | SPOF19J10 | 2019 | Olive flounder  | Jeju Island          | la    |
| 71  | SPOF19J11 | 2019 | Olive flounder  | Jeju Island          | la    |
| 72  | SPOF19J12 | 2019 | Olive flounder  | Jeju Island          | la    |
| 73  | SPOF19J13 | 2019 | Olive flounder  | Jeju Island          | la    |
| 74  | SPOF19J14 | 2019 | Olive flounder  | Jeju Island          | la    |
| 75  | SPOF19J15 | 2019 | Olive flounder  | Jeju Island          | lb/lc |
| 76  | SPOF19P1  | 2019 | Olive flounder  | Pohang (Gyeongsang)  | la    |
| 77  | SPOF21J1  | 2021 | Olive flounder  | Jeju Island          | la    |
| 78  | SPOF21J2  | 2021 | Olive flounder  | Jeju Island          | ll    |
| 79  | SPOF21J3  | 2021 | Olive flounder  | Jeju Island          | la    |
| 80  | SPOF21J4  | 2021 | Olive flounder  | Jeju Island          | ll    |
| 81  | SPOF21J5  | 2021 | Olive flounder  | Jeju Island          | la    |
| 82  | SPOF21J6  | 2021 | Olive flounder  | Jeju Island          | la    |
| 83  | SPOF21J7  | 2021 | Olive flounder  | Jeju Island          | la    |
| 84  | SPOF21J8  | 2021 | Olive flounder  | Jeju Island          | la    |
| 85  | SPOF21J9  | 2021 | Olive flounder  | Jeju Island          | la    |
| 86  | SPOF21J10 | 2021 | Olive flounder  | Jeju Island          | la    |
| 87  | SPOF21J11 | 2021 | Olive flounder  | Jeju Island          | la    |
| 88  | SPOF21J12 | 2021 | Olive flounder  | Jeju Island          | la    |
| 89  | SPOF21J13 | 2021 | Olive flounder  | Jeju Island          | la    |
| 90  | SPOF21J14 | 2021 | Olive flounder  | Jeju Island          | la    |
| 91  | SPOF21J15 | 2021 | Olive flounder  | Jeju Island          | la    |
| 92  | SPOF21J16 | 2021 | Olive flounder  | Jeju Island          | ll    |
| 93  | SPOF21J17 | 2021 | Olive flounder  | Jeju Island          | la    |
| 94  | SPOF21J18 | 2021 | Olive flounder  | Jeju Island          | la    |
| 95  | SPOF21J19 | 2021 | Olive flounder  | Jeju Island          | la    |
| 96  | SPOF21J20 | 2021 | Olive flounder  | Jeju Island          | ll    |
| 97  | SPOF21J21 | 2021 | Olive flounder  | Jeju Island          | la    |
| 98  | SPOF21J22 | 2021 | Olive flounder  | Jeju Island          | la    |
| 99  | SPOF21J23 | 2021 | Olive flounder  | Jeju Island          | la    |
| 100 | SPOF21J24 | 2021 | Olive flounder  | Jeju Island          | la    |
| 101 | SPOF21J25 | 2021 | Olive flounder  | Jeju Island          | la    |
| 102 | SPSF21J1  | 2021 | Starry flounder | Jeju Island          | lb/lc |
| 103 | SPOF21J26 | 2021 | Olive flounder  | Jeju Island          | la    |

---

**Table S2. Antibiotic disk zone diameters of 103 strains of *Streptococcus parauberis***

| Zone (mm) | Antibiotics* |     |     |     |     |     |     |     |     |     |
|-----------|--------------|-----|-----|-----|-----|-----|-----|-----|-----|-----|
|           | AMX          | OTC | ERY | FFC | ENR | SXT | CFL | EFT | CLI | CHL |
| 6         |              | 68  | 29  |     |     |     |     |     | 3   |     |
| 7         |              | 1   | 2   |     |     |     |     |     |     |     |
| 8         |              | 1   | 1   |     |     |     |     |     |     |     |
| 9         |              | 2   | 2   |     |     |     |     |     |     |     |
| 10        |              | 1   | 4   |     |     |     |     |     |     |     |
| 11        |              | 1   | 1   |     |     |     |     |     |     |     |
| 12        |              | 1   |     |     |     |     |     |     | 1   |     |
| 13        |              | 1   |     |     |     |     |     |     | 3   |     |
| 14        |              |     |     |     |     |     | 3   | 1   | 3   |     |
| 15        |              |     |     |     |     |     | 2   |     | 1   |     |
| 16        |              |     |     |     |     |     | 1   |     | 4   |     |
| 17        | 1            |     |     |     |     | 1   | 2   |     | 3   |     |
| 18        |              |     | 1   |     | 1   | 3   | 1   |     | 2   |     |
| 19        |              |     | 1   |     |     | 2   |     |     | 8   |     |
| 20        | 2            |     | 3   |     | 1   | 2   | 2   |     |     |     |
| 21        | 4            |     | 2   | 1   | 1   | 9   | 3   | 3   | 2   |     |
| 22        | 3            | 1   |     |     | 4   | 9   | 3   | 1   | 1   |     |
| 23        | 6            | 2   | 1   | 1   | 5   | 12  | 2   | 4   | 2   |     |
| 24        | 14           |     |     | 1   | 6   | 14  | 8   | 4   | 1   |     |
| 25        | 15           |     |     | 2   | 10  | 14  | 13  | 3   | 1   | 2   |
| 26        | 10           | 2   | 1   | 4   | 15  | 7   | 12  | 7   |     | 10  |
| 27        | 4            | 1   |     | 3   | 11  | 16  | 9   | 1   | 1   | 11  |
| 28        | 8            | 1   | 1   | 8   | 12  | 7   | 6   | 4   |     | 12  |
| 29        | 4            | 2   |     | 7   | 8   | 4   | 10  | 6   | 6   | 20  |
| 30        | 4            | 1   | 15  | 17  | 14  | 3   | 4   | 17  | 14  | 16  |
| 31        | 5            | 5   | 6   | 18  | 5   |     | 1   | 5   | 12  | 3   |
| 32        | 3            | 4   | 13  | 22  | 7   |     | 4   | 17  | 13  | 13  |
| 33        |              | 2   | 1   | 4   | 1   |     | 2   | 2   | 5   | 4   |
| 34        |              | 3   | 3   | 8   |     |     |     | 5   | 8   | 6   |
| 35        |              | 1   | 4   | 5   |     |     | 2   | 4   | 2   | 3   |
| 36        | 3            | 2   | 4   |     | 1   |     | 3   | 3   | 4   | 2   |
| 37        |              |     | 3   | 1   |     |     | 3   | 2   | 2   | 1   |
| 38        | 3            |     | 2   | 1   |     |     | 2   | 6   |     |     |
| 39        | 2            |     | 2   |     | 1   |     |     | 4   |     |     |
| 40        | 4            |     |     |     |     |     | 5   | 1   | 1   |     |
| 41        | 7            |     | 1   |     |     |     |     | 1   |     |     |
| 42        |              |     |     |     |     |     |     | 2   |     |     |
| 43        | 1            |     |     |     |     |     |     |     |     |     |

\*Abbreviations for antibiotic agent are as in the materials and methods.

\*\*Areas in grey indicate the range of zones for wild-type isolates.

**Table S3. Primers used in this study**

| Primer*                           | Sequences (5'-3')      | Product size | Reference  |
|-----------------------------------|------------------------|--------------|------------|
| <b>Identification</b>             |                        |              |            |
| Spa-2152 -F                       | TTTCGTCTGAGGCAATGTTG   | 718          | 8          |
| Spa-2870 -R                       | GCTTCATATATCGCTATACT   |              |            |
| <b>Serotyping</b>                 |                        |              |            |
| Serotype Ia -F                    | ATTGTTAGTCATTCAGTTGT   | 213          | 9          |
| Serotype Ia -R                    | AATTATAGTCAACAGTCCAG   |              |            |
| Serotype Ib/Ic -F                 | ATTTCTACCAGTTACTTTG    | 303          | 9          |
| Serotype Ib/Ic -R                 | ACATCTCGAAACTTCATATT   |              |            |
| Serotype II -F                    | GAACTACTTAGGTTTAGCAT   | 413          | 9          |
| Serotype II -R                    | AACTTGTAATAGGATTGCT    |              |            |
| Serotype III -F                   | GACCAACACCAGCACCAATA   | 130          | 10         |
| Serotype III -R                   | TTTGGACAACCTGGAAGAGC   |              |            |
| <b>Antibiotic resistance gene</b> |                        |              |            |
| <i>tet</i> (M) -F                 | GTAAATAGTGTCTTGGAG     | 657          | 11         |
| <i>tet</i> (M) -R                 | CTAAGATATGGCTCTAACAA   |              |            |
| <i>tet</i> (S) -F                 | CATAGACAAGCCGTTGACC    | 667          | 12         |
| <i>tet</i> (S) -R                 | ATGTTTTTGGAACGCCAGAG   |              |            |
| <i>erm</i> (B) -F                 | GTAACAGTTGACGATATTCTCG | 224          | 13         |
| <i>erm</i> (B) -R                 | CGTACCTTGGATATTCACCG   |              |            |
| <i>mef</i> (J) -F                 | CTTTTGCTGGCAGATTACA    | 182          | This study |
| <i>mef</i> (J) -R                 | TGCTGGCATATGAAAAGCAG   |              |            |
| <i>msr</i> (I) -F                 | TTCGAAAGGGCTAAGTGGTG   | 229          | This study |
| <i>msr</i> (I) -R                 | CCCATCATCAACTTCCCAA    |              |            |

\*F, forward; R, reverse.

**Table S4. General features of *Streptococcus parauberis* whole genome sequences used in this study**

| Strain              | Level      | Genome size (Mbp) | No. of CDS | Serotype | Origin           | Region of isolation | Year of isolation | Accession number | Reference  |
|---------------------|------------|-------------------|------------|----------|------------------|---------------------|-------------------|------------------|------------|
| <b>SPOF21J26</b>    | Complete   | 2.08              | 1,827      | Ia       | Olive flounder   | South Korea         | 2021              | CP119428-9       | This study |
| <b>SPOF19J15</b>    | Complete   | 1.99              | 1,736      | II       | Olive flounder   | South Korea         | 2019              | CP119426         | This study |
| <b>SPOF21J2</b>     | Complete   | 2                 | 1,736      | Ib/Ic    | Olive flounder   | South Korea         | 2021              | CP119430         | This study |
| <b>KSP45</b>        | Complete   | 2.15              | 2,016      | Ia       | Olive flounder   | South Korea         | 1999              | CP119427         | This study |
| <b>SPOF3K</b>       | Complete   | 2.15              | 2,049      | Ia       | Olive flounder   | South Korea         | 2013              | CP025420-1       | 6          |
| <b>HFTC0064</b>     | Complete   | 2.16              | 2,155      | Ia       | Olive flounder   | South Korea         | 2014              | CP104190-1       | 7          |
| <b>KSP20</b>        | Complete   | 2.23              | 2,255      | Ib/Ic    | Olive flounder   | South Korea         | 2005              | CP104048         | 7          |
| <b>KSP10</b>        | Complete   | 2.08              | 2,020      | II       | Olive flounder   | South Korea         | 2004              | CP104047         | 7          |
| <b>KSP14</b>        | Complete   | 2.08              | 2,020      | II       | Olive flounder   | South Korea         | 2005              | CP104046         | 7          |
| <b>KCTC 11537</b>   | Complete   | 2.14              | 1,868      | Ib/Ic    | Olive flounder   | South Korea         | 2006              | CP002471         | 14         |
| <b>KCTC 11980BP</b> | Scaffold   | 2.14              | 1,890      | Ia       | Olive flounder   | South Korea         | 2010              | BANN01           | 15         |
| <b>KRS-02083</b>    | Contig     | 2.18              | 2,143      | Ia       | Olive flounder   | Japan               | 2002              | ALYM01           | 14         |
| <b>KRS-02109</b>    | Contig     | 2.05              | 1,966      | II       | Olive flounder   | Japan               | 2002              | ALWR01           | 14         |
| <b>SK-417</b>       | Contig     | 1.96              | 1,871      | Ib/Ic    | Black seaperch   | Japan               | 2013              | BAWT01           | 16         |
| <b>T1</b>           | Contig     | 2.01              | 1,909      | III      | Turbot           | Spain               | 1997              | LQRN01           | 10         |
| <b>AZ70.1</b>       | Contig     | 2.02              | 1,907      | III      | Turbot           | Spain               | 1994              | NSGS01           | 10         |
| <b>N11</b>          | Contig     | 2                 | 1,976      | III      | Striped bass     | USA                 | 2002              | LIXR01           | 17         |
| <b>PL23</b>         | Contig     | 2.02              | 1,985      | III      | Striped bass     | USA                 | 2002              | LHAD01           | 17         |
| <b>PL9</b>          | Contig     | 2.01              | 1,993      | III      | Striped bass     | USA                 | 2002              | LJCT01           | 17         |
| <b>RP15</b>         | Contig     | 2.01              | 1,959      | III      | Striped bass     | USA                 | 2002              | LRBI01           | 17         |
| <b>RP17</b>         | Contig     | 2.02              | 1,964      | III      | Striped bass     | USA                 | 2002              | LRBJ01           | 17         |
| <b>RP25</b>         | Contig     | 2.03              | 1,953      | III      | Striped bass     | USA                 | 2002              | LRBK01           | 17         |
| <b>N198_2</b>       | Contig     | 1.98              | 1,924      | III      | Striped bass     | USA                 | 2006              | LHAC01           | 17         |
| <b>FSL S3-0563</b>  | Contig     | 2.13              | 2,059      | Others   | Cow (milk)       | USA                 | 2001              | LHAE01           | NA*        |
| <b>FSL R5-0305</b>  | Contig     | 2.09              | 1,939      | Others   | Cow (milk)       | USA                 | 2006              | LRFJ01           | NA         |
| <b>FSL R5-303</b>   | Contig     | 2.08              | 1,956      | Others   | Cow (milk)       | USA                 | 2006              | LRDN01           | NA         |
| <b>FSL W6-0838</b>  | Contig     | 2.11              | 1,987      | Others   | Cow (milk)       | USA                 | NA                | LRBL01           | NA         |
| <b>SP204-42-2</b>   | Contig     | 2.13              | 2,010      | Others   | Cow (milk)       | Finland             | 2001              | LQRM01           | NA         |
| <b>SP158-29</b>     | Contig     | 2.09              | 2,021      | Others   | Cow (mastitis)   | Finland             | 2001              | NSGR01           | NA         |
| <b>NCFD 2020</b>    | Chromosome | 2.16              | 2,059      | Others   | Cow (mastitis)   | UK                  | NA                | AEUT02           | NA         |
| <b>Fin349</b>       | Contig     | 2.18              | 2,056      | Others   | Packaged chicken | Finland             | 2001              | LQRO01           | NA         |

\* NA, Not available.

## Supplementary Figures

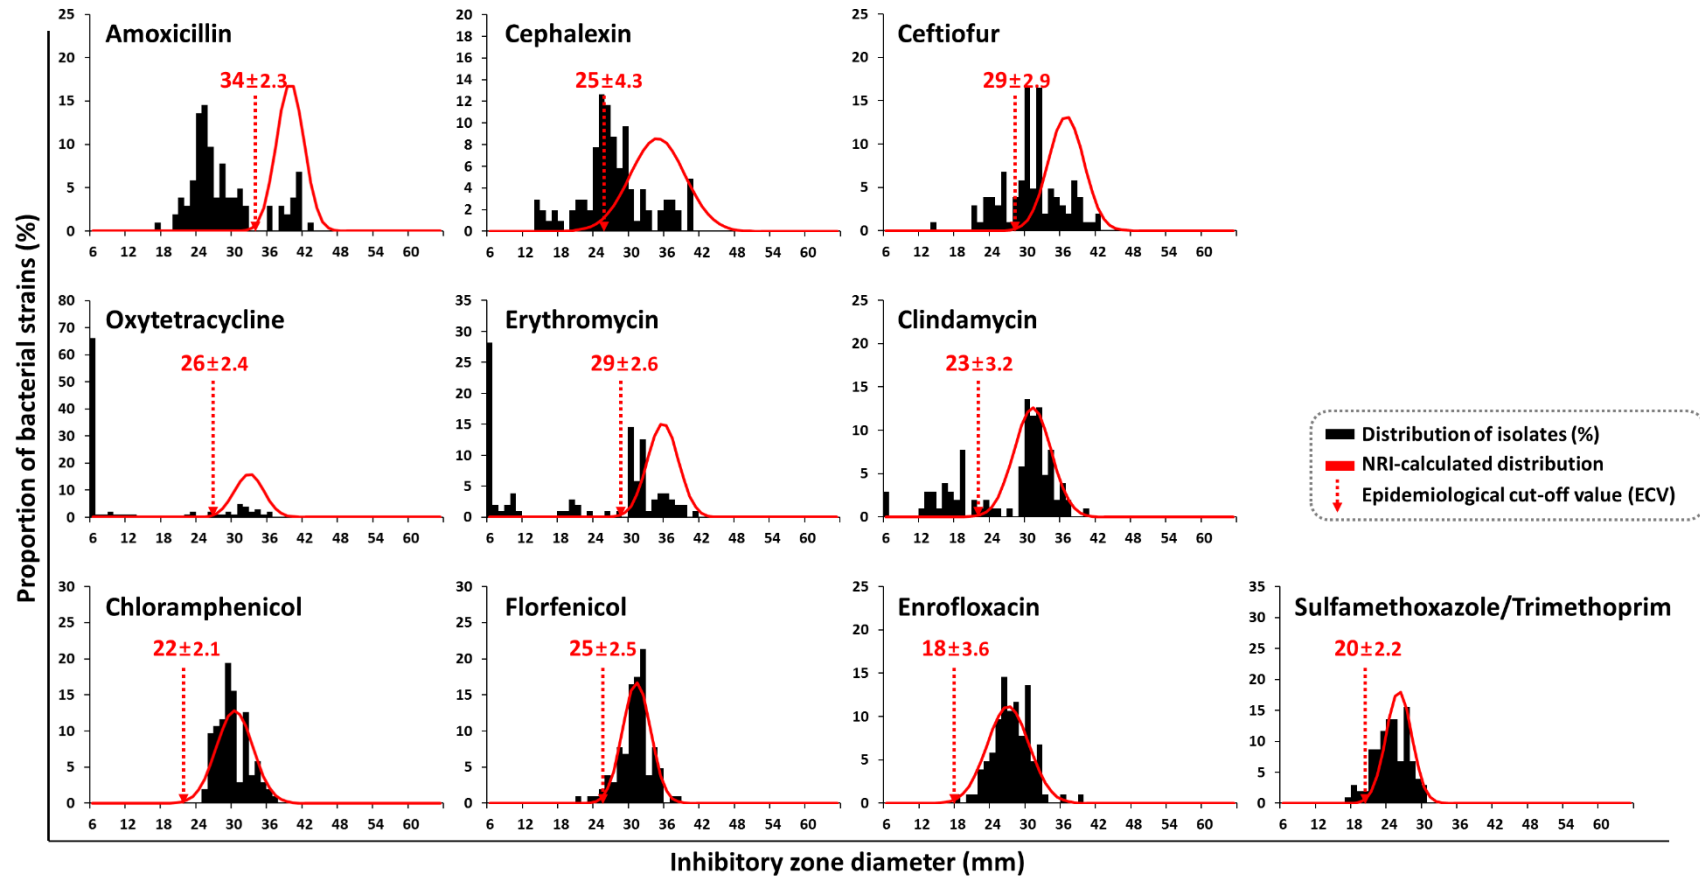

**Figure S1.** Inhibitory zone diameter histogram of disk diffusion tests of ten antibiotics in 103 *Streptococcus parauberis* isolates from fish. The normalized resistance interpretation (NRI)-calculated theoretical populations of wild type strains are shown as red line graphs, and the epidemiological cut-off values (ECV) are shown above the red arrows with standard deviations.



(A)

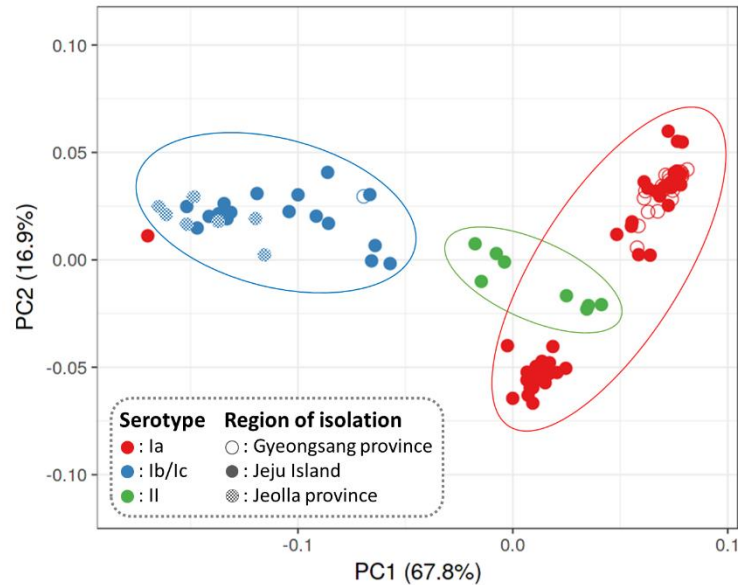

(B)

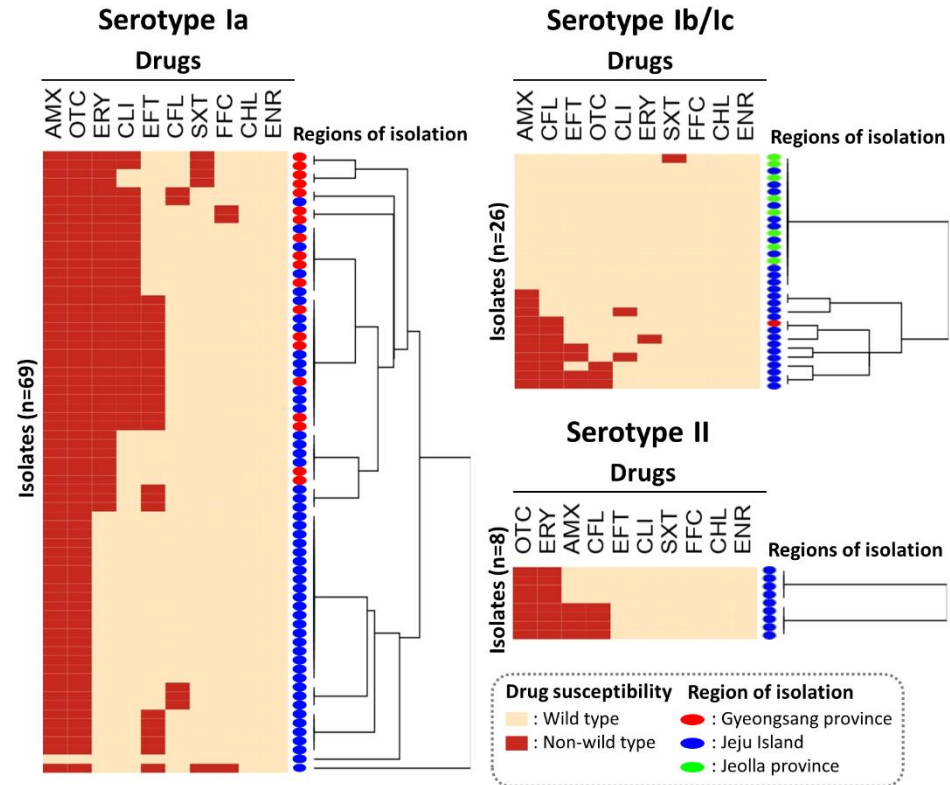

**Figure S2. Principal component analysis (PCA; A) and hierarchical clustering analysis (B) based on the antibiogram of 103 *Streptococcus parauberis* isolates against ten antibiotics.** (A) The PCA plot captures the variance in the dataset composed of normalized inhibitory zone diameters obtained from the disk diffusion tests of 103 *S. parauberis* strains. The X and Y-axes show principal components 1 and 2, which explain 67.8% and 16.9% of the total variance, respectively. The color and shape of the marks indicate serotypes and the region of isolation. (B) Heatmaps show the wild type (beige) and non-wild type (red) distributions of *S. parauberis* isolates according to serotype. The red, blue, and green ellipses, located on the right side of the heatmap indicate the region of isolation. Abbreviations for the antibiotic agents are shown in Table 2.

(A)

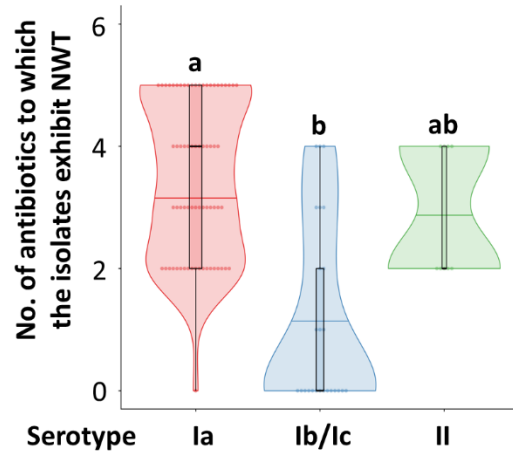

(B)

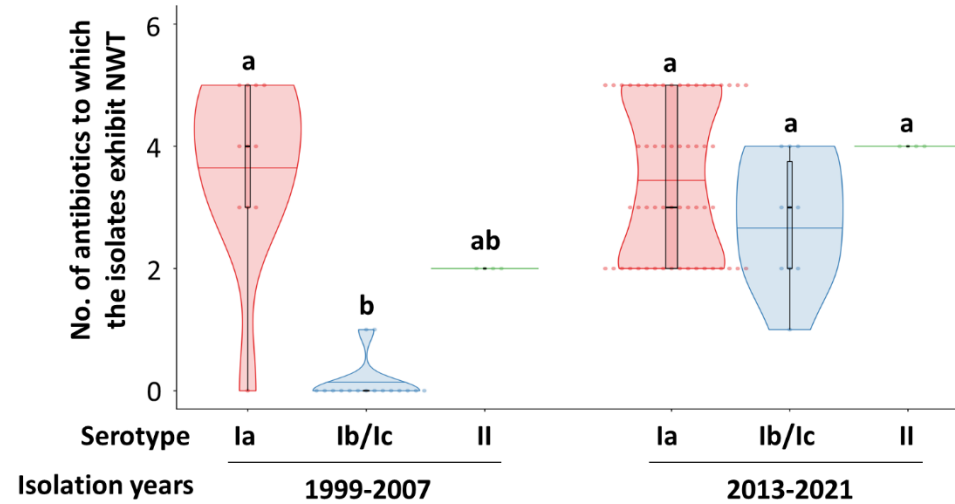

**Figure S3. Violin plot demonstrating the number of antibiotics to which the isolates exhibit non-wild type (NWT) in *Streptococcus parauberis*.** The number of NWT-classified antibiotics in respective isolates are presented as dots inside the violin plot and box plot. The violin plot represents the minimum value to maximum value with the probability density of the data. In the box plot, the bold line inside the box, box boundaries, and error lines represent the median value, 25<sup>th</sup> – 75<sup>th</sup> and 10<sup>th</sup> – 90<sup>th</sup> percentiles, respectively. The width of the box indicates the relative number of samples. Statistical differences were analyzed using the Kruskal–Wallis test, followed by the post hoc Dunn's test with Bonferroni correction (significance at adjusted  $p$ -value < 0.05).

## References

1. **Kim N, Lee Y, Tho HD, Park JY, Lee JY, Kang Y, Kim D.** 2022. Whole-Genome Sequences of Three *Edwardsiella piscicida* Isolates from Diseased Fish in South Korea. *Microbiology Resource Announcements* **11**:e00097-22.
2. **Lanfeer R, Schalamun M, Kainer D, Wang W, Schwessinger B.** 2019. MinIONQC: fast and simple quality control for MinION sequencing data. *Bioinformatics* **35**:523–525.
3. **Kolmogorov M, Yuan J, Lin Y, Pevzner PA.** 2019. Assembly of long, error-prone reads using repeat graphs. *Nat Biotechnol* **37**:540–546.
4. **Mikheenko A, Prjibelski A, Saveliev V, Antipov D, Gurevich A.** 2018. Versatile genome assembly evaluation with QUAST-LG. *Bioinformatics* **34**:i142–i150.
5. **Tatusova T, DiCuccio M, Badretdin A, Chetvernin V, Nawrocki EP, Zaslavsky L, Lomsadze A, Pruitt KD, Borodovsky M, Ostell J.** 2016. NCBI Prokaryotic Genome Annotation Pipeline. *Nucleic Acids Res* **44**:6614–6624.
6. **Lee Y, Nguyen TL, Kim A, Kim N, Roh HJ, Han H, Jung S, Cho M, Kang HY, Kim D.** 2018. Complete genome sequence of multiple-antibiotic-resistant *Streptococcus parauberis* strain SPOF3K, isolated from diseased olive flounder (*Paralichthys olivaceus*). *Genome announcements* **6**:e00248-18.
7. **Lee Y, Kim A, Kim N, Roh H, Ho DT, Kim D.** 2023. Complete Genome Sequences of *Streptococcus parauberis* Serotype Ia, Ib/Ic, and II Isolates from Diseased Olive Flounder in South Korea. *Microbiology Resource Announcements* e01058-22.
8. **Mata AI, Gibello A, Casamayor A, Blanco MM, Domínguez L, Fernández-Garayzábal J.** 2004. Multiplex PCR assay for detection of bacterial pathogens associated with warm-water streptococcosis in fish. *Appl Environ Microbiol* **70**:3183-3187.
9. **Tu C, Suga K, Kanai K.** 2015. A Multiplex PCR Assay for Differentiation of *Streptococcus parauberis* Serotypes. *Fish Pathol* **50**:213-215.
10. **Torres-Corral Y, Santos Y.** 2020. Comparative genomics of *Streptococcus parauberis*: new target for molecular identification of serotype III. *Appl Microbiol Biotechnol* **104**:6211-6222.
11. **Aarestrup FM, Agero Y, Gerner-Smidt P, Madsen M, Jensen LB.** 2000. Comparison of antimicrobial resistance phenotypes and resistance genes in *Enterococcus faecalis* and *Enterococcus faecium* from humans in the community, broilers, and pigs in Denmark. *Diagn Microbiol Infect Dis* **37**:127-137.
12. **Ng L, Martin I, Alfa M, Mulvey M.** 2001. Multiplex PCR for the detection of tetracycline resistant genes. *Mol Cell Probes* **15**:209-215.
13. **Nagai K, Shibasaki Y, Hasegawa K, Davies TA, Jacobs MR, Ubukata K, Appelbaum PC.** 2001. Evaluation of PCR primers to screen for *Streptococcus pneumoniae* isolates and  $\beta$ -

lactam resistance, and to detect common macrolide resistance determinants. *J Antimicrob Chemother* **48**:915-918.

**14. Nho S, Hikima J, Park SB, Jang HB, Cha IS, Yasuike M, Nakamura Y, Fujiwara A, Sano M, Kanai K.** 2013. Comparative genomic characterization of three *Streptococcus parauberis* strains in fish pathogen, as assessed by wide-genome analyses. *PLoS One* **8**:e80395.

**15. Park MA, Kwon MG, Hwang JY, Jung SH, Kim D, Park J, Kim J, Na Y, Kim M, Kim D.** 2013. Genome sequence of *Streptococcus parauberis* strain KCTC11980, isolated from diseased *Paralichthys olivaceus*. *Genome announcements* **1**:e00780-13.

**16. Oguro K, Yamane J, Yamamoto T, Ohnishi K, Oshima S, Imajoh M.** 2014. Draft genome sequence of *Streptococcus parauberis* strain SK-417, isolated from diseased *Sebastes ventricosus* in Kagoshima, Japan. *Genome announcements* **2**:e00453-14.

**17. Haines A, Nebergall E, Besong E, Council K, Lambert O, Gauthier D.** 2016. Draft genome sequences for seven *Streptococcus parauberis* isolates from wild fish in the Chesapeake Bay. *Genome Announcements* **4**:e00741-16
